# Supplementary material for: Bio-based poly(benzimidazole-co-amide)-derived N, O co-doped carbons as fast-charging anodes for lithium-ion batteries
Source: Royal Society of Chemistry journal article supplement (doi:10.1039/d4na00416g), 2024-01-01
Supplement: d4na00416g1.pdf [file d4na00416g1.pdf]

## Bio-based poly(benzimidazole-co-amide) as a fast charging anode of lithium-ion battery

Kottisa Sumala Patnaik<sup>a</sup>, Bharat Srimitra Mantripragada<sup>a</sup>, Rajashekar Badam<sup>a</sup>, Koichi Higashimine<sup>b</sup>, Xianzhu Zhong<sup>a</sup>, Tatsuo Kaneko<sup>a</sup> and Noriyoshi Matsumi<sup>a,c,d\*</sup>

[a] Graduate School of Advanced Science and Technology, Japan Advanced Institute of Science and Technology (JAIST), Nomi, Ishikawa 923-1292, Japan.

E-mail: matsumi@jaist.ac.jp

[b] Centre for Nano Materials and Technology, Japan Advanced Institute of Science and Technology (JAIST), Nomi, Ishikawa 923-1292, Japan

[c] Division of Transdisciplinary Sciences, Japan Advanced Institute of Science and Technology (JAIST), Nomi, Ishikawa 923-1292, Japan

[d] Elements Strategy Initiative for Catalysts and Batteries (ESCIB), Kyoto University, Nishikyo-ku, Kyoto 615-8245, Japan.

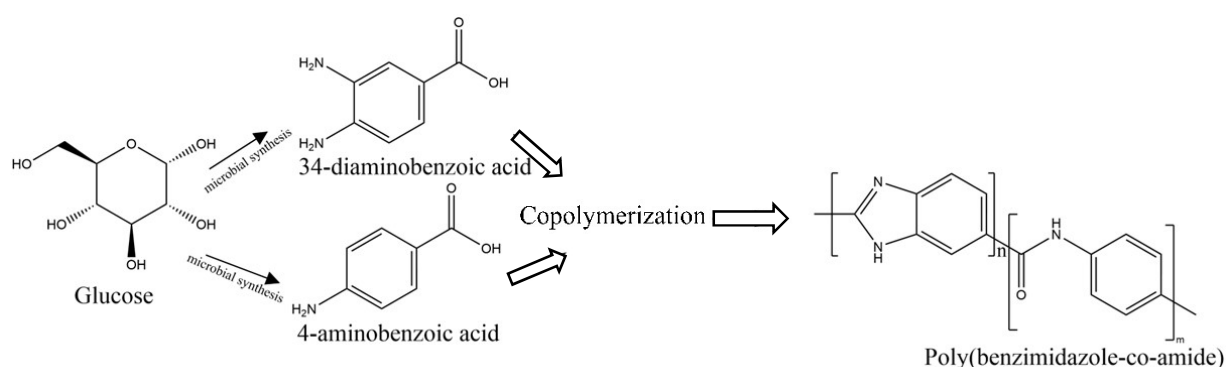

Synthetic scheme1: Synthetic procedure for poly(benzimidazole-co-amide) [1]

### Calculation of R factor

- R factor is a measure of the number of carbon sheets arranged as single layers.

$$R = \frac{B}{A}$$

Where A refers to the background  
B refers to the peak height

- The background A is determined by drawing a straight line connecting the data on either side of the peak. And B is determined by drawing a line tangent to the background estimate which intersects 002 in a single point.

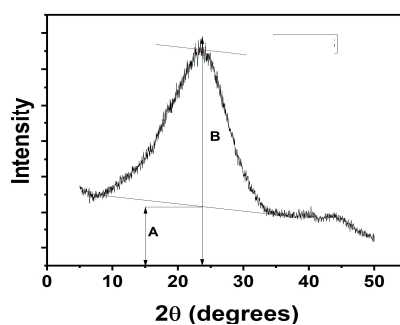

Fig.S1: Procedure for determination of R factor

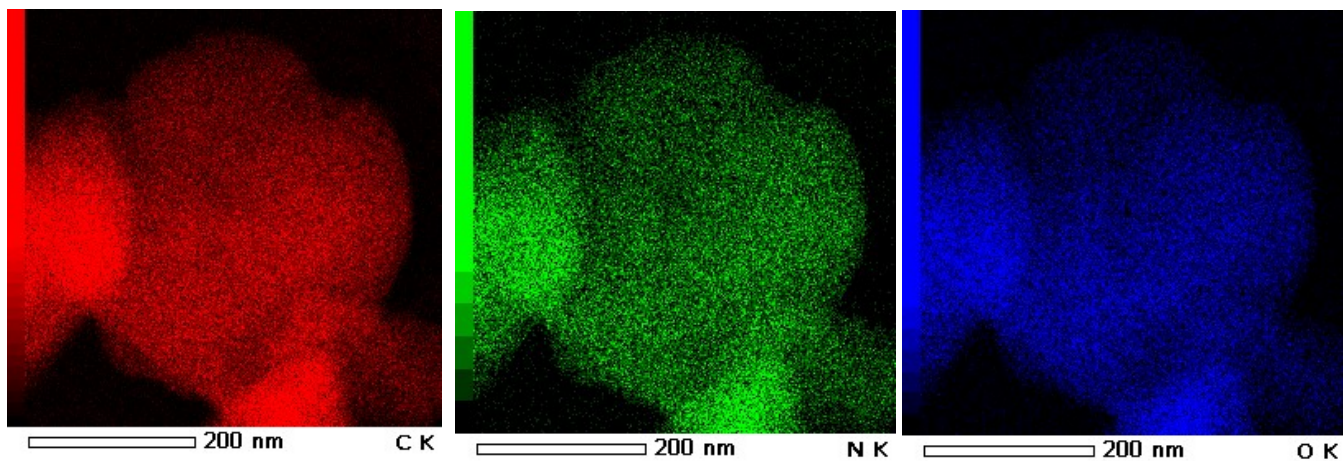

Fig.S2: TEM-EDX elemental mapping of PYPBIPA8.5-1.5

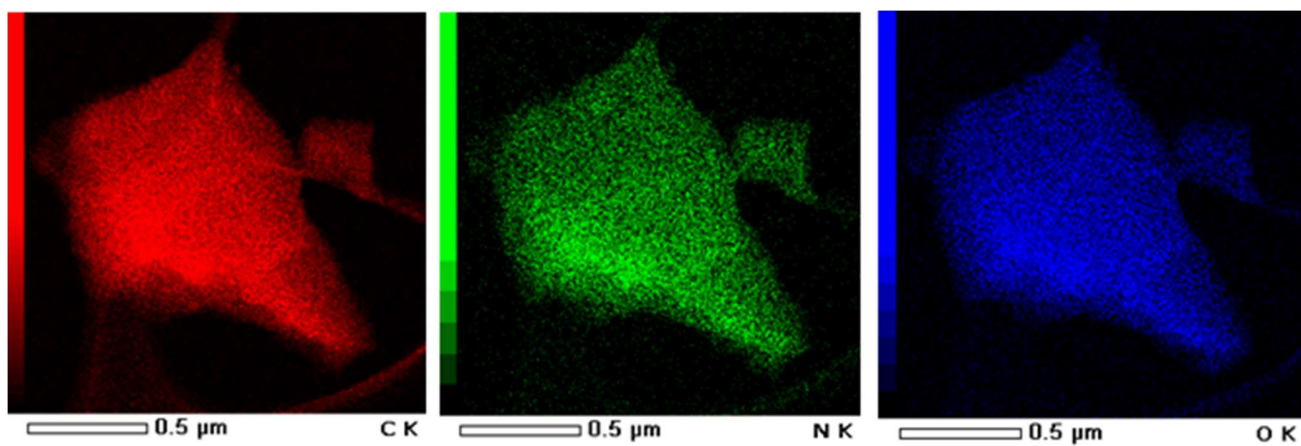

Fig.S3: TEM-EDX elemental mapping of PYPBIPA7-3

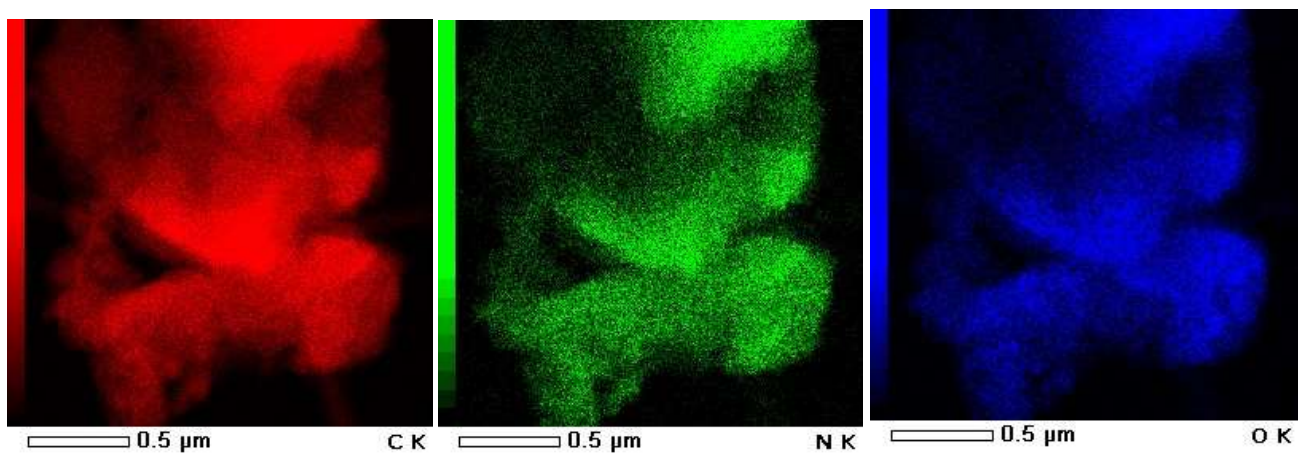

Fig.S4: TEM-EDX elemental mapping of PYPBIPA5-5

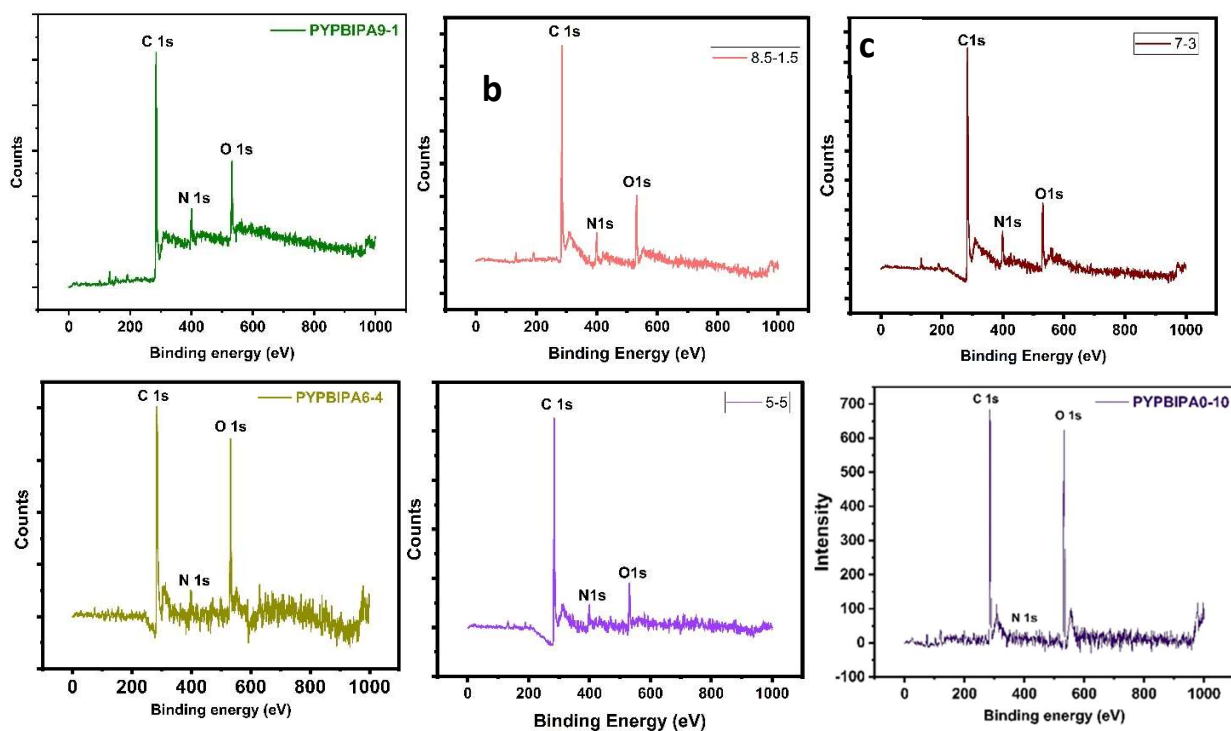

Fig.S5: XPS survey spectrum of PYPBIPA(a)9-1 (b) 8.5-1.5 (c)7-3 (d) 6-4 (e) 5-5 (f) 0-10

Table S1: Nitrogen and oxygen doping contents in various carbon materials derived from PBIPA.

| Carbon material | N at% | O at% |
|-----------------|-------|-------|
| PYPBIPA10-0[1]  | 14.6  | 0.6   |
| PYPBIPA 9-1     | 12.1  | 11.8  |
| PYPBIPA8.5-1.5  | 11.2  | 13.1  |
| PYPBIPA7-3      | 9.9   | 20.0  |
| PYPBIPA6-4      | 9.2   | 21.8  |
| PYPBIPA5-5      | 8.0   | 25.0  |
| PYPBIPA0-10     | 2.6   | 31.3  |

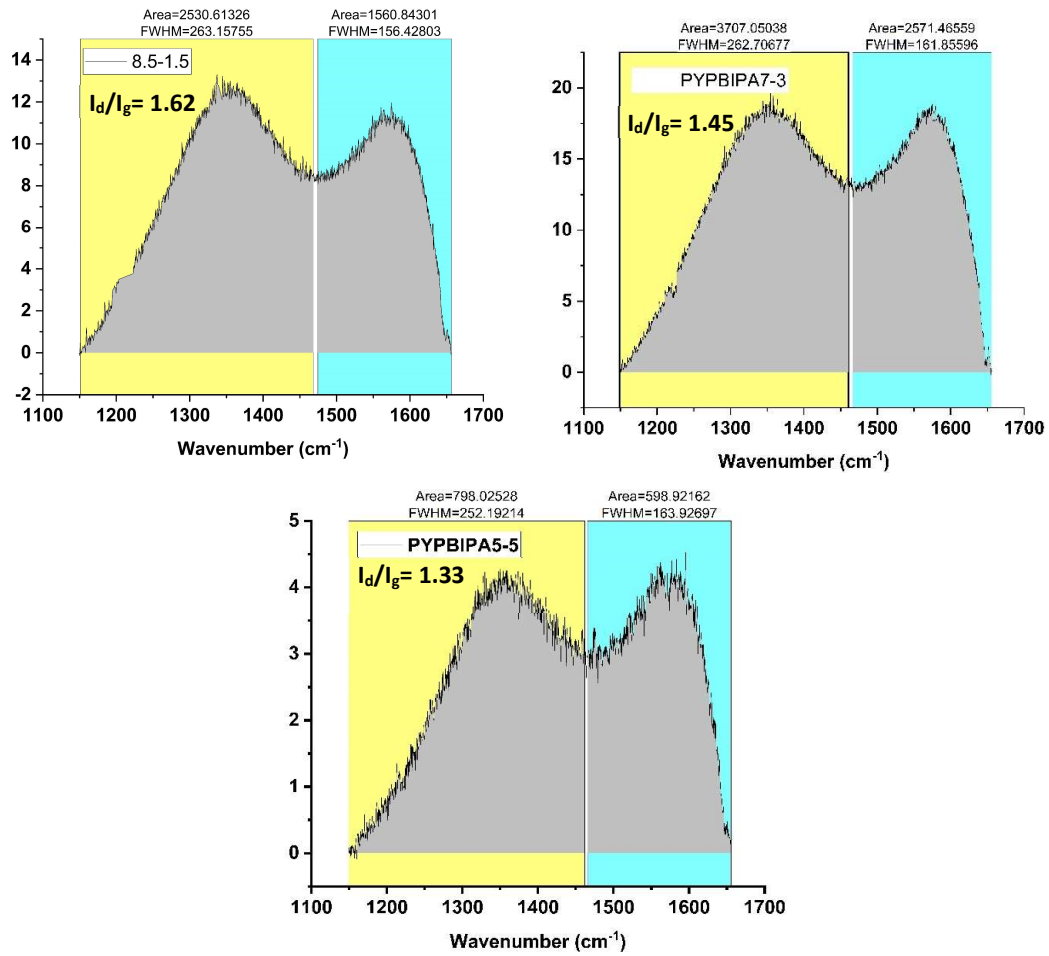

Fig. S6: Ratio of the D peak to G peak based on the ratio of the area of D peak and G peak.

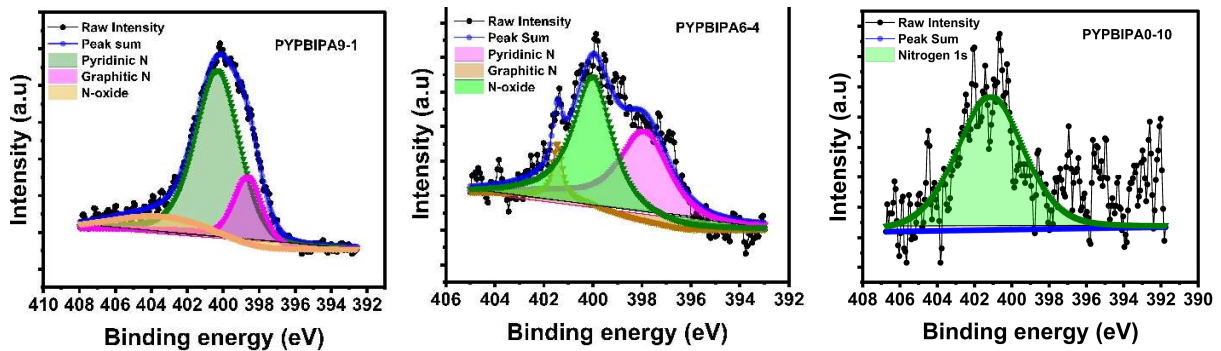

Figure S7: Deconvoluted N1s spectra of (a) PYPBIPA9-1 (b) 6-4 and (c) 0-10

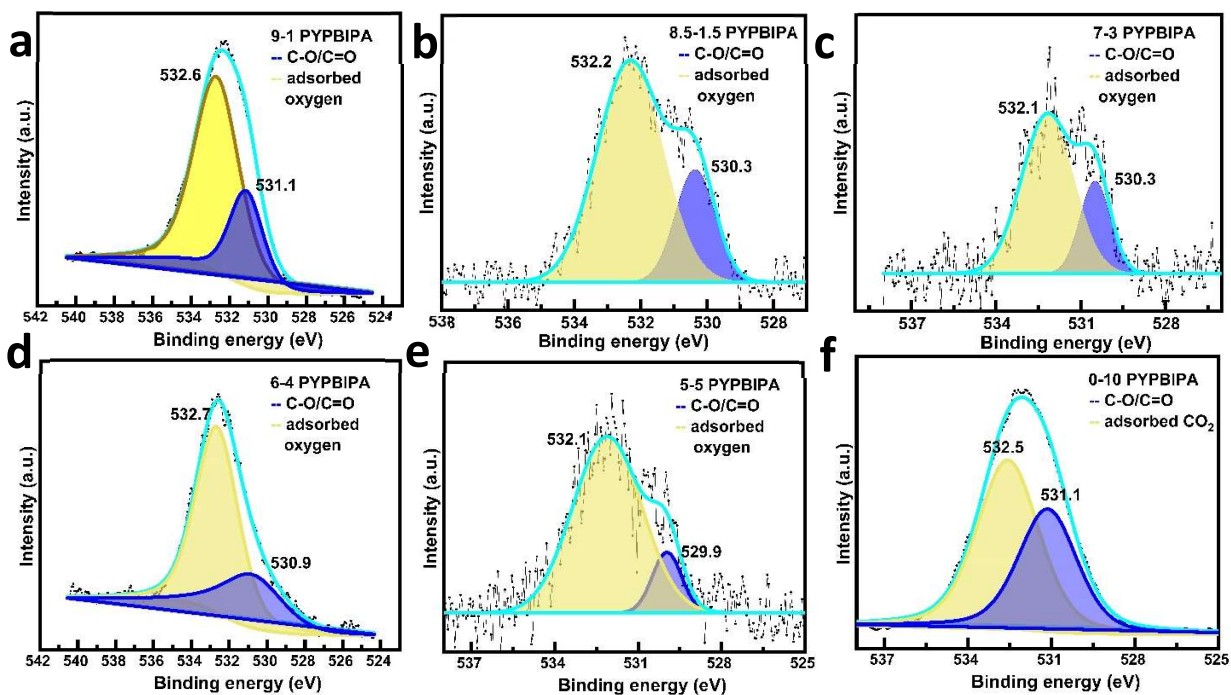

Fig. S8: Deconvoluted O1s peak for PYPBIPA (a) 9-1 (b) 8.5-1.5 (c) 7-3 (d) 6-4 (e) 5-5 (f) 0-10

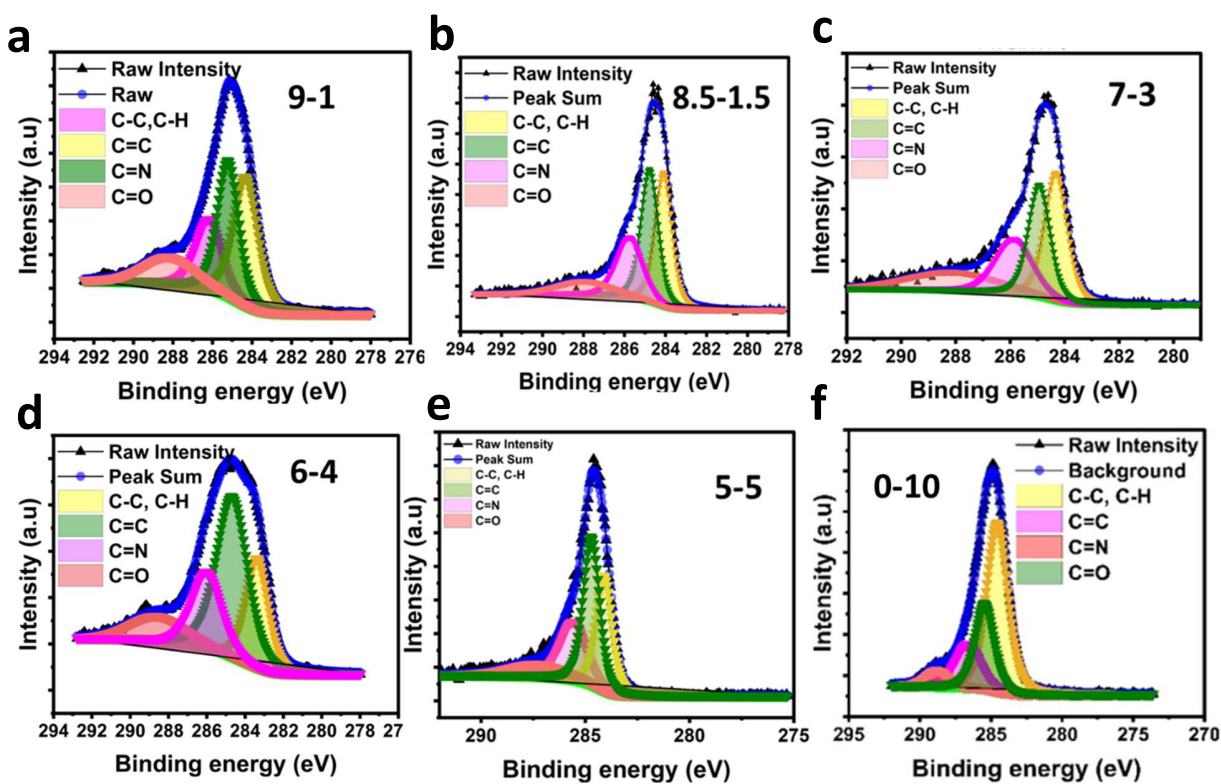

Fig.S9: Deconvoluted C1s peak for PYPBIPA (a)9-1 (b)8.5-1.5 (c) 7-3 (d) 6-4 (e) 5-5 (f) 0-10

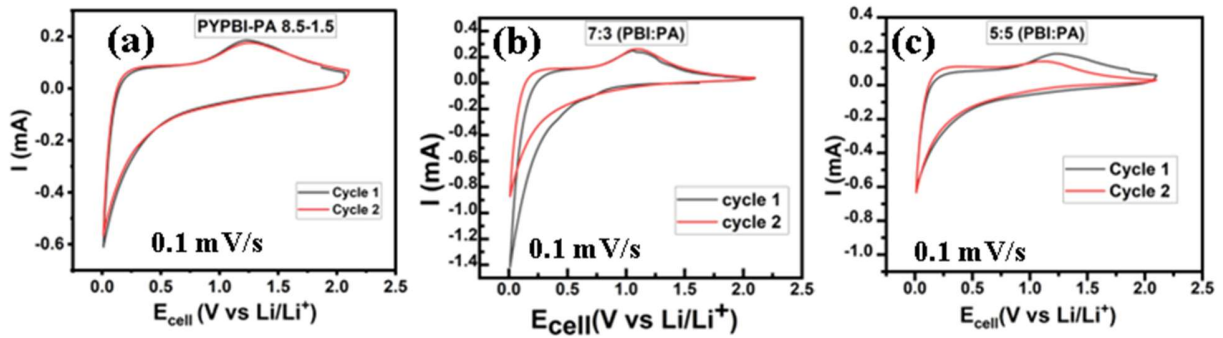

Fig. S10: Cyclic voltammograms of PYPBIPA (a) 8.5-1.5 (b) 7-3 and (c) 5-5

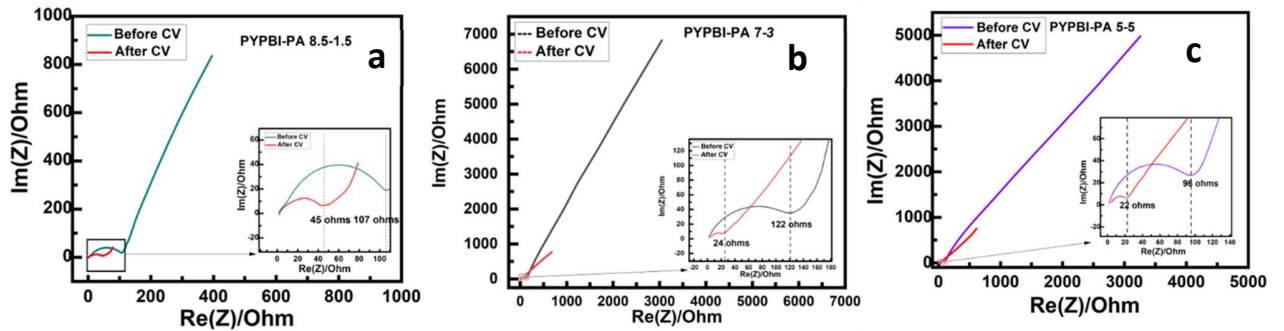

Fig. S11: PEIS before and after cyclic voltammetry for PYPBIPA (a) 8.5-1.5 (b) 7-3 (c) 5-5

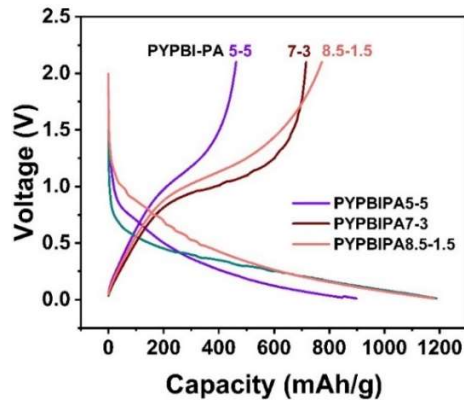

Fig. S12: Initial charge-discharge plot for PYPBIPA 8.5-1.5, 7-3, 5-5

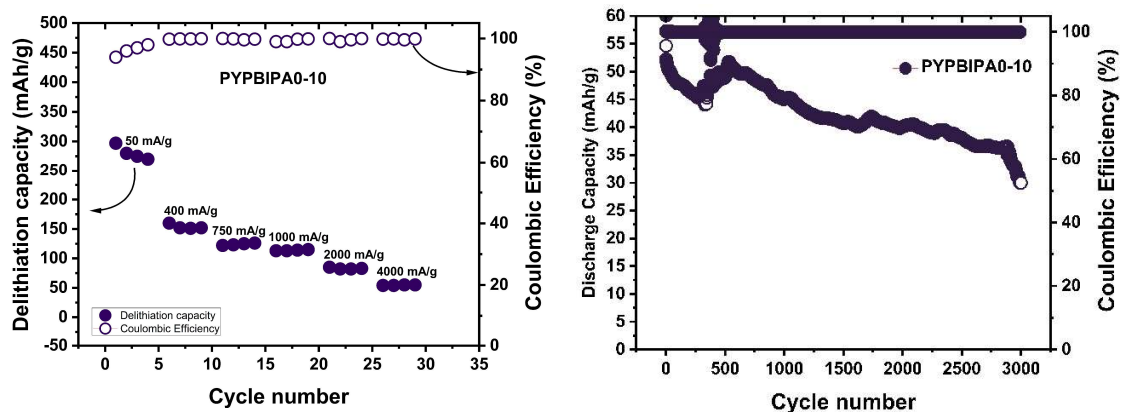

Figure S13: (a) Rate studies (b) long cycling for PYPBIPA0-10

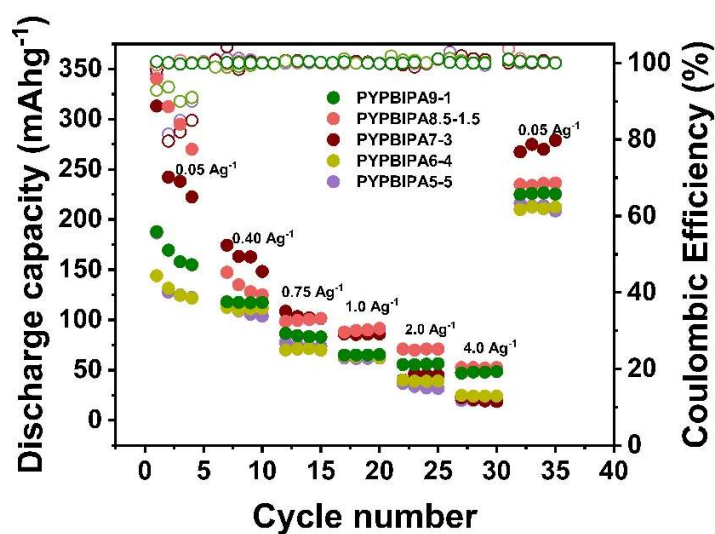

Figure S14: Comparison of rate studies for PYPBIPA9-1, 8.5-1.5, 7-3, 6-4, and 5-5

Table S2: Comparison of rate studies of PYPBIPA10-0, 9-1, 8.5-1.5, 7-3, 6-4, 5-5 and 0-10

| Current density (A/g) | Capacity (mAh/g) |     |         |     |     |     |      |
|-----------------------|------------------|-----|---------|-----|-----|-----|------|
|                       | 10-0[1]          | 9-1 | 8.5-1.5 | 7-3 | 6-4 | 5-5 | 0-10 |
| 0.05                  | -                | 330 | 600     | 500 | 250 | 270 | 280  |
| 0.40                  | 206              | 235 | 256     | 325 | 220 | 211 | 152  |
| 0.75                  | 168              | 167 | 199     | 204 | 140 | 147 | 125  |
| 1.0                   | -                | 130 | 180     | 171 | 128 | 123 | 113  |
| 2.0                   | 125              | 111 | 140     | 90  | 80  | 64  | 85   |
| 4.0                   | -                | 94  | 100     | 38  | 48  | 39  | 55   |

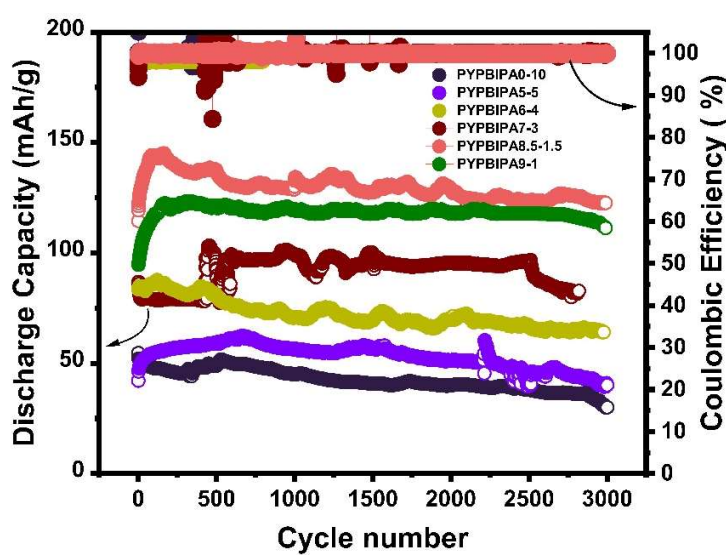

Figure S15: Comparison of long cycling for PYPBIPA9-1, 8.5-1.5, 7-3, 6-4, 5-5 and 0-10

Table S3: Comparison of rate studies of PYPBIPA10-0, 9-1, 8.5-1.5, 7-3, 6-4, 5-5 and 0-10

| Carbon material | Discharge capacity (mAh/g) | Capacity retention (%) |
|-----------------|----------------------------|------------------------|
| PYPBIPA 9-1     | 122                        | 90                     |
| PYPBIPA8.5-1.5  | 137                        | 90                     |
| PYPBIPA7-3      | 100                        | 83                     |
| PYPBIPA6-4      | 84                         | 76                     |
| PYPBIPA5-5      | 60                         | 65                     |
| PYPBIPA0-10     | 51                         | 59                     |

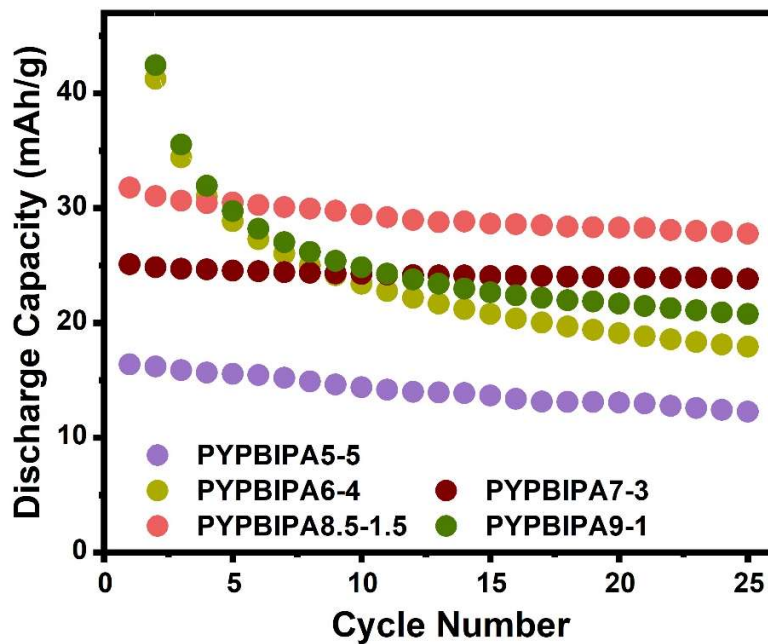

Figure S16: Long cycling plot for symmetric cells of PYPBIPA9-1, 8.5-1.5, 7-3, 6-4, and 5-5.



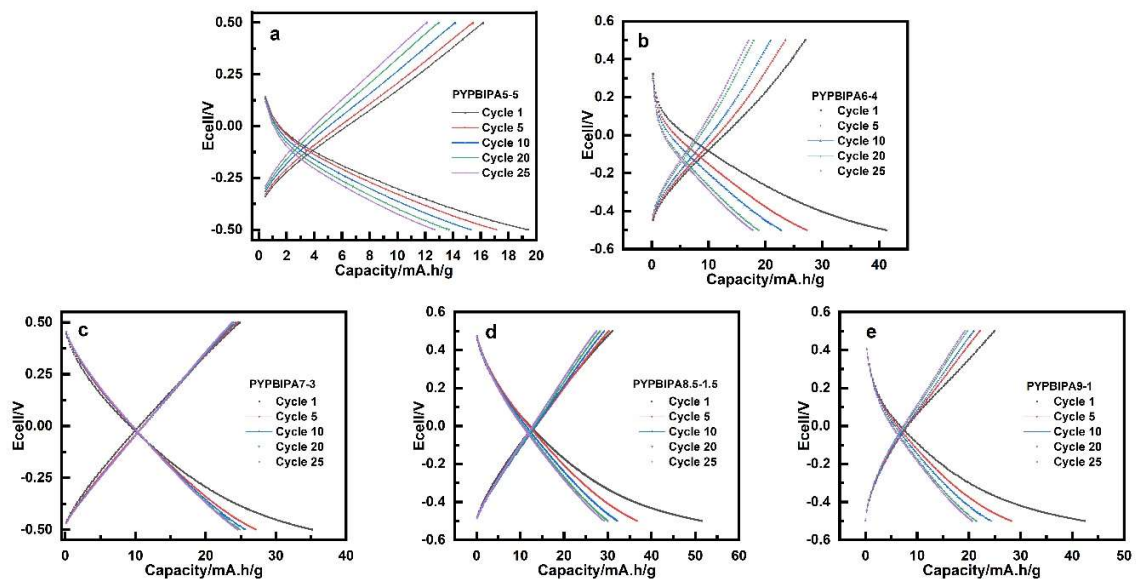

Figure S17: Voltage vs capacity plots for PYPBIPA 0-10, 5-5, 6-4, 7-3, 8.5-1.5 and 9-1 symmetric cells

Table S4-Capacity retention of PYPBIPA materials after 25 cycles

| Sample         | Retention (%) | Cycles |
|----------------|---------------|--------|
| PYPBIPA5-5     | 47.6%         | 25     |
| PYPBIPA6-4     | 52.9%         | 25     |
| PYPBIPA7-3     | 88.0%         | 25     |
| PYPBIPA8.5-1.5 | 91.3%         | 25     |
| PYPBIPA9-1     | 68.7%         | 25     |

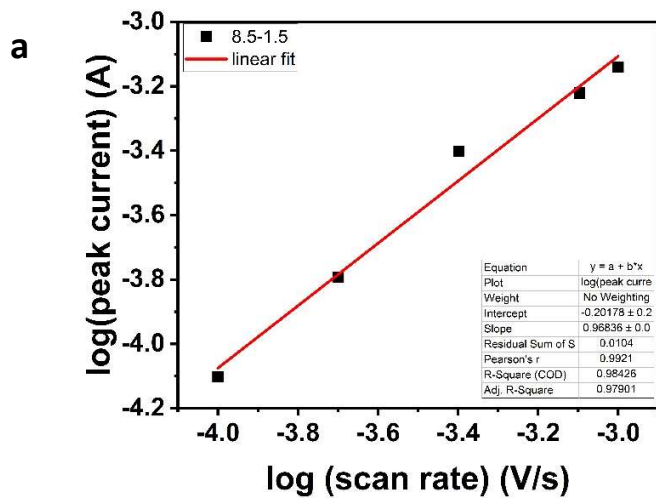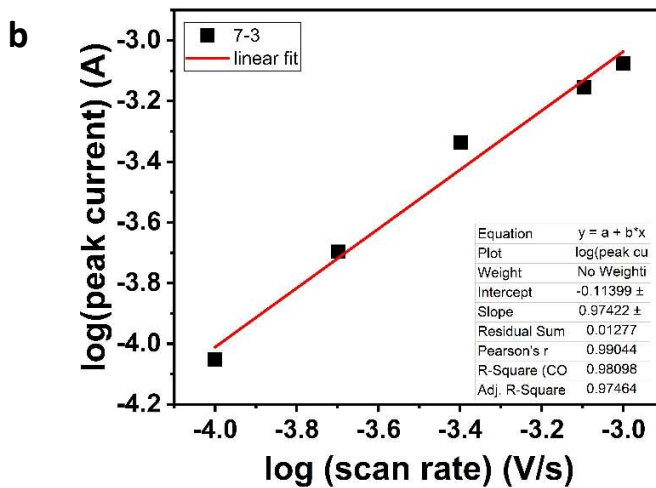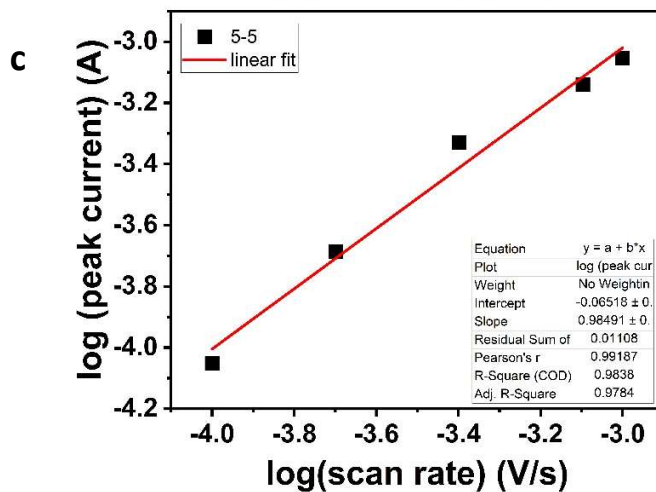

Fig.S18: Linear fit of  $\log i$  vs  $\log v$  for PYPBIPA (a) PYPBIPA8.5-1.5 (b) 7-3 and (c) 5-5

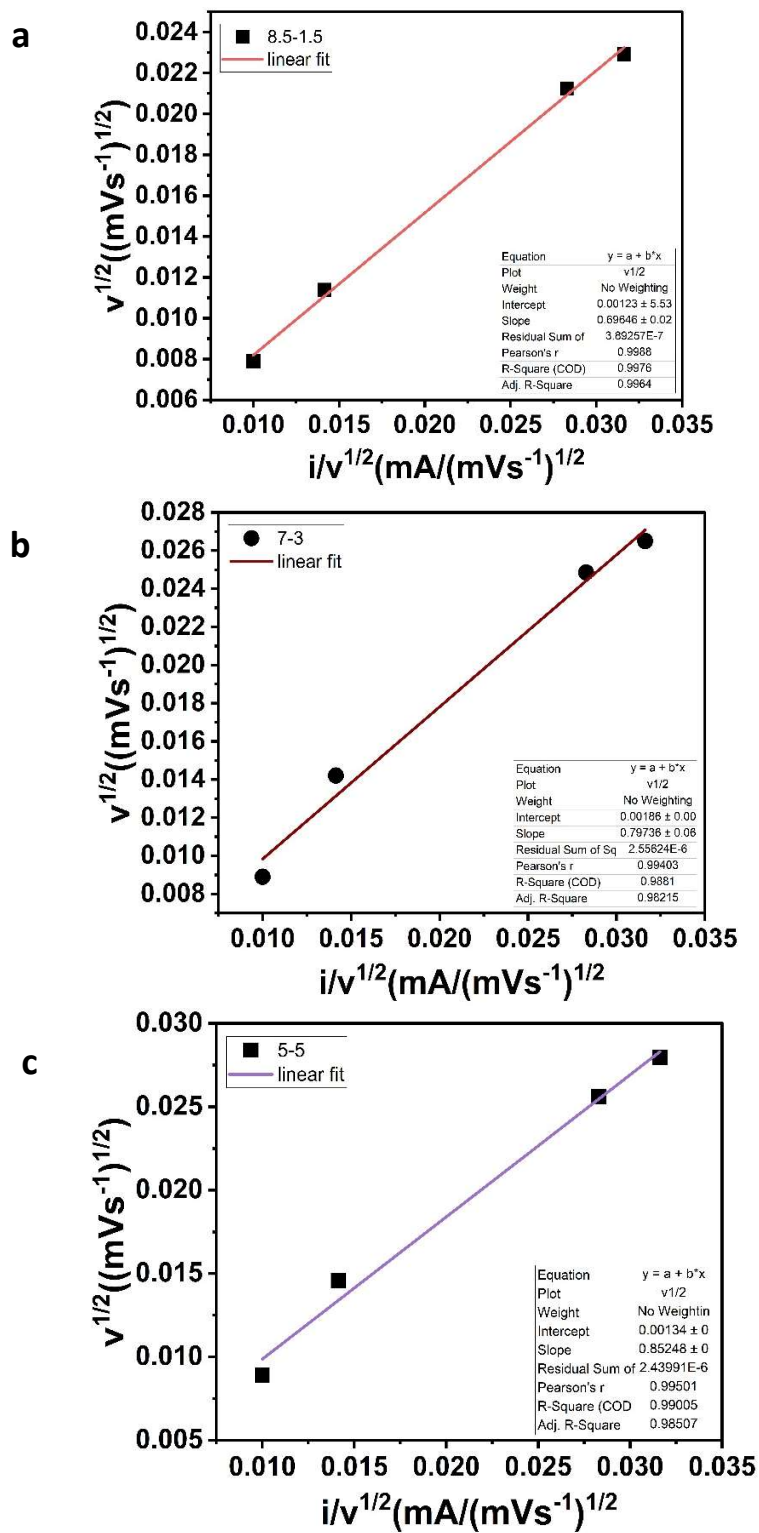

Fig.S19: Linear fit of  $i/v^{1/2}$  vs  $v^{1/2}$  for PYPBIPA (a) PYPBIPA8.5-1.5 (b) 7-3 and (c) 5-5

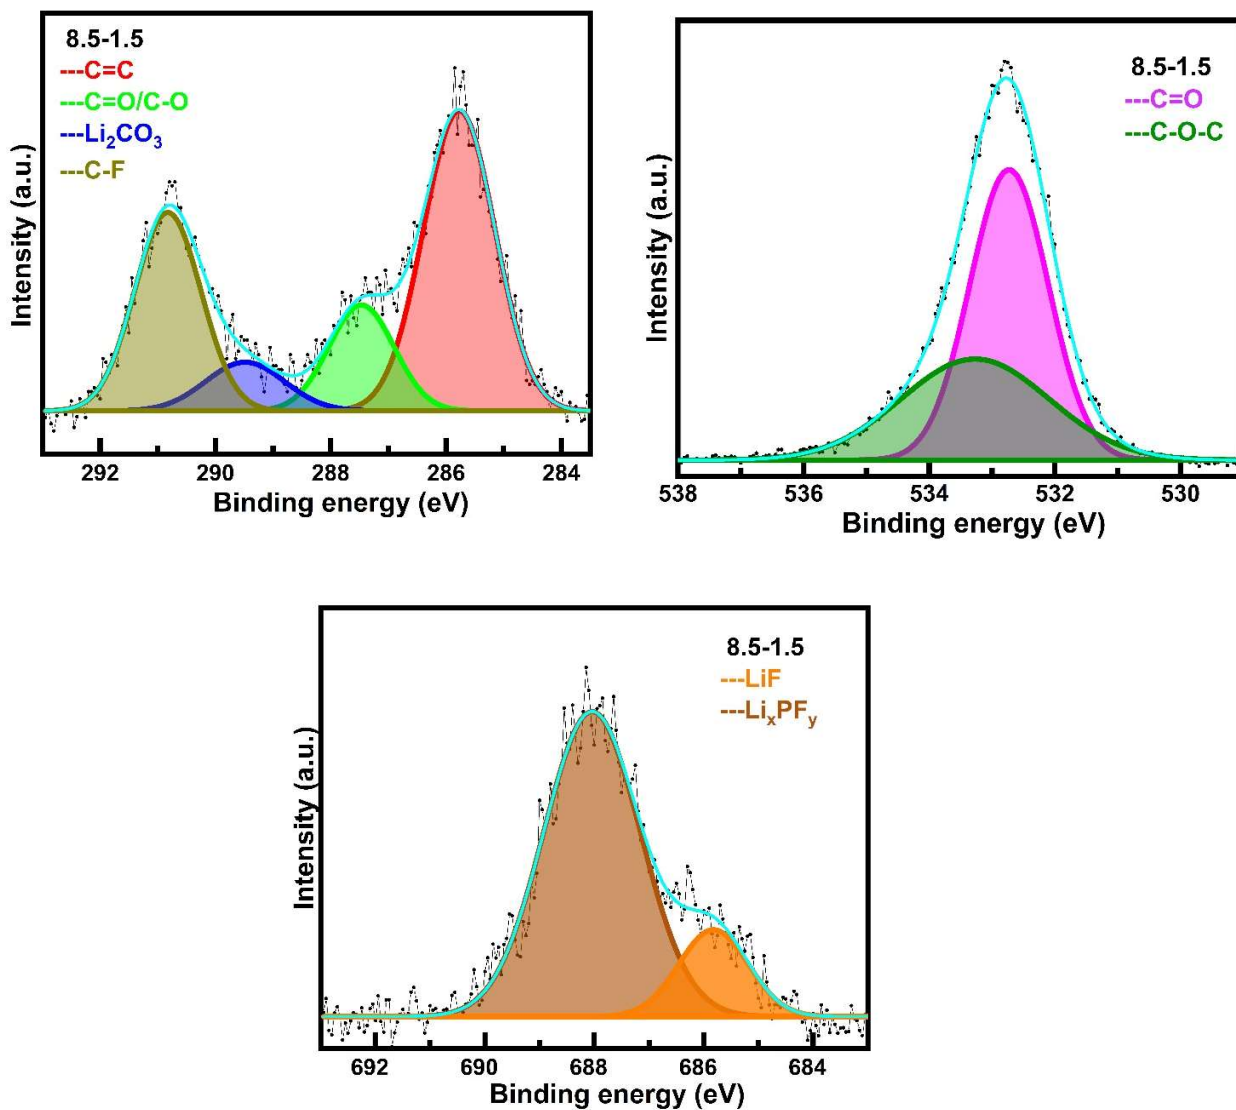

Fig.S20: XPS of decrimped anode of PYPBIPA8.5-1.5 (a) C1s (b) O1s (c) F1s

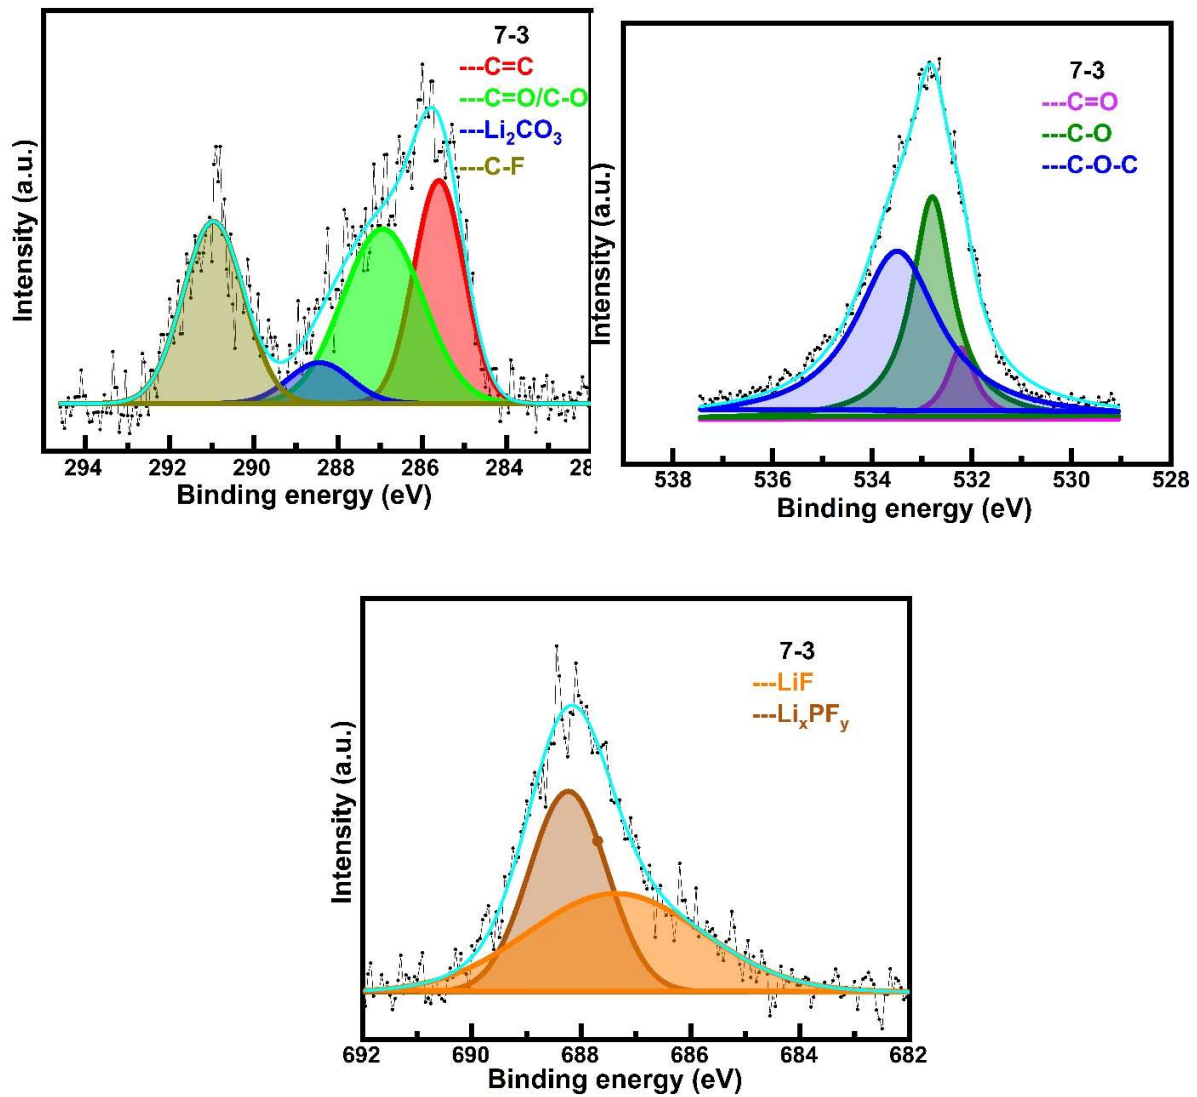

Fig.S21: XPS of deprimed anode of PYPBIPA7-3 (a) C1s (b) O1s (c) F1s

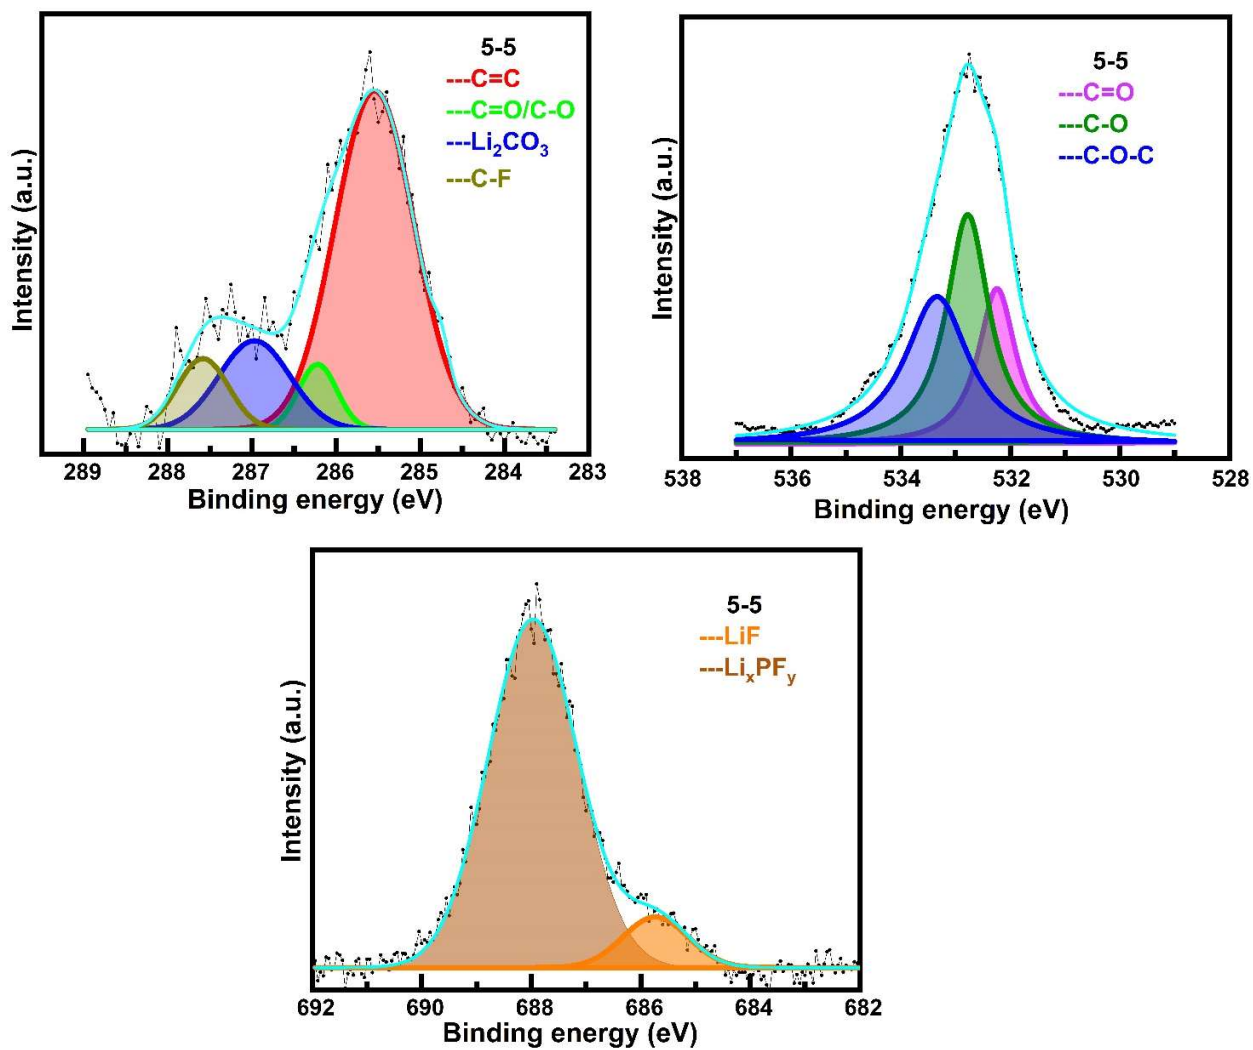

Fig.S22: XPS of decrimped anode of PYPBIPA5-5 (a) C1s (b) O1s (c) F1s

References:

- [1] K. S. Patnaik, R. Badam, Y. Peng, K. Higashimine, T. Kaneko, N. Matsumi, *Chemical Communications* **2021**, 57, 13704–13707.
